# Supplementary material
Source: PubMed Central journal article supplement (PMC5906170)
Supplement: NIHMS926899-supplement-Supp_info.pdf [file NIHMS926899-supplement-Supp_info.pdf]

## **Supplementary Files.**

**Table S1.** Diabetes and risk of hepatocellular carcinoma (HCC) in the pooled cohort of women and men (1986 – 2012; N=146,642), with further adjustment for oral hypoglycemic medication use, insulin use or both medication types

**Table S2.** Insulin use, oral antidiabetic medications and risk of HCC, in men and women with type 2 diabetes from 1986-2012 (N=22,448)

**Table S3.** Diabetes and risk of HCC among women (1980-2012) and men (1986-2012), after excluding any individual with incident HCC arising within 4 years of a diagnosis of type 2 diabetes

**Table S4.** Diabetes and Risk of HCC in women (1980-2012) and men (1986-2012), after excluding any case of HCC associated with HBV or HCV infection

**Table S5.** Diabetes and risk of Intrahepatic Cholangiocarcinoma (ICC) in women (1980-2012) and men (1986-2012)

**Table S1.**

Diabetes and risk of hepatocellular carcinoma (HCC) in the pooled cohort of women and men (1986 – 2012; N=146,642), with further adjustment for oral hypoglycemic medication use, insulin use or both medication types

| <b>Combined cohort</b>            | <b>No Diabetes</b> | <b>Diabetes</b>  |
|-----------------------------------|--------------------|------------------|
| <i>Cases / Person-Years</i>       | 70 / 3,460,215     | 37 / 275,370     |
| Model 1; HR (95%CI)               | 1                  | 5.03 (3.35-7.56) |
| Multivariable Model 2; HR (95%CI) | 1                  | 5.09 (3.28-7.91) |
| Multivariable Model 3; HR (95%CI) | 1                  | 4.80 (2.96-7.78) |
| Multivariable Model 4; HR (95%CI) | 1                  | 4.78 (3.05-7.49) |
| Multivariable Model 5; HR (95%CI) | 1                  | 4.54 (2.76-7.45) |

Abbreviations: HCC, hepatocellular carcinoma; HR, hazard ratio; CI, confidence interval

Model 1 = age (continuous, years), sex, race (white vs. non-white), and body mass index (<25kg/m<sup>2</sup> vs. 25-30kg/m<sup>2</sup> vs. ≥30kg/m<sup>2</sup>), updated over time.

Model 2 = Model 1 + family history of diabetes (no vs. yes), smoking status (past, current, never), alcohol intake (0 – 4.9 g/day, 5-14.9 g/day, ≥15 g/day), physical activity level (<3 METs/week, 3-8.9 METs/week, ≥9 METs/week), and regular aspirin use (non-use vs. use of ≥ 2 tablets/week), with all relevant variables updated over time.

Model 3 = Model 2 + oral hypoglycemic medication use (non-use vs. use).

Model 4 = Model 2 + insulin use (non-use vs. use).

Model 5 = Model 2 + use of either oral hypoglycemic medications or insulin (non-use vs. any use).

**Table S2:**

Insulin use, oral antidiabetic medications and risk of HCC, in men and women with type 2 diabetes from 1986-2012 (N=22,448)

|                                      | <b>Diabetes without Insulin use</b>           | <b>Diabetes with Insulin use</b>           |
|--------------------------------------|-----------------------------------------------|--------------------------------------------|
| <i>Cases / Person-Years</i>          | 21 / 177,775                                  | 4 / 14,356                                 |
| HR adjusted for age (95% CI)         | 1                                             | 2.10 [0.71-6.19]                           |
| Multivariable Model 2 †; HR (95% CI) | 1                                             | 2.10 [0.71-6.21]                           |
| Multivariable Model 3 ‡; HR (95% CI) | 1                                             | 2.04 [0.69-6.09]                           |
|                                      | <b>Diabetes without oral antidiabetic use</b> | <b>Diabetes with oral antidiabetic use</b> |
| <i>Cases / Person-Years</i>          | 12 / 110,577                                  | 13 / 81,554                                |
| HR adjusted for age (95% CI)         | 1                                             | 1.39 [0.67-2.89]                           |
| Multivariable Model 2 †; (95% CI)    | 1                                             | 1.39 [0.66-2.90]                           |
| Multivariable Model 3 ‡; HR (95% CI) | 1                                             | 1.45 [0.69-3.07]                           |

Abbreviations: HCC, hepatocellular carcinoma; HR, hazard ratio; CI, confidence interval

† Model 2 adjusted for age, sex, race, updated body mass index (<25kg/m<sup>2</sup>, 25-30kg/m<sup>2</sup>, ≥30kg/m<sup>2</sup>).

‡ Model 3 adjusted for Model 2 + smoking status (current, former, never), alcohol intake (0 g/day, 0.1-4.9 g/day, 5-14.9 g/day, ≥15 g/day), physical activity level, in METs / week (<3 METs/week, 3-8.9 METs/week, ≥9 METs/week), and family history of diabetes (no vs. yes).

**Table S3.**

Diabetes and risk of HCC among women (1980-2012) and men (1986-2012), after excluding any individual with incident HCC arising within 4 years of a diagnosis of type 2 diabetes\*

|                                                  | No diabetes    | Diabetes         |
|--------------------------------------------------|----------------|------------------|
| <i>Cases / Person-Years</i>                      | 75 / 4,223,105 | 33 / 298,627     |
| Age-adjusted Model; HR (95%CI)                   | 1              | 4.16 [2.74-6.32] |
| Multivariable Model 2 <sup>‡</sup> ; HR (95% CI) | 1              | 4.04 [2.62-6.22] |
| Multivariable Model 3 <sup>§</sup> ; HR (95% CI) | 1              | 3.99 [2.55-6.26] |

Abbreviations: HCC, hepatocellular carcinoma; HR, hazard ratio; CI, confidence interval

<sup>‡</sup> Model 2 adjusted for age, sex, race (white vs. non-white), and updated body mass index (<25kg/m<sup>2</sup>, 25-30kg/m<sup>2</sup>, ≥30kg/m<sup>2</sup>).

<sup>§</sup> Model 3, adjusted for Model 2 + smoking status (current active smoker vs. former smoker vs. never-smoker), alcohol intake (0 – 4.9 g/day, 5-14.9 g/day, ≥15 g/day), physical activity level (<3 METs/week, 3-8.9 METs/week, ≥9 METs/week), regular aspirin use (≥ 2 aspirin tablets per week vs non-use), and family history of diabetes (no vs. yes). All relevant covariates are updated over time.

\*N=4 individuals were diagnosed with HCC within 4 years of a confirmed diagnosis of type 2 diabetes, and were excluded from this analysis

**Table S4.**

Diabetes and Risk of HCC in women (1980-2012) and men (1986-2012), after excluding any case of HCC associated with HBV or HCV infection<sup>1</sup>

| <b>Combined cohort</b>                          | <b>No Diabetes</b> | <b>Diabetes</b>  |
|-------------------------------------------------|--------------------|------------------|
| <i>Cases / person-years (PY)</i>                | 60 / 4,192,248     | 31 / 295,750     |
| Age-adjusted Model; HR (95%CI)                  | 1                  | 4.93 [3.16-7.70] |
| Multivariable Model 2 <sup>‡</sup> ; HR (95%CI) | 1                  | 4.70 [2.95-7.47] |
| Multivariable Model 3 <sup>§</sup> ; HR (95%CI) | 1                  | 4.82 [2.97-7.81] |

Abbreviations: HCC, hepatocellular carcinoma; HBV, hepatitis B virus; HCV, hepatitis C virus; HR, hazard ratio; CI, confidence interval

<sup>1</sup>Confirmation of HBV- or HCV-associated HCC was made through manual review of all patient charts with confirmed HCC, with subsequent exclusion of n=21 cases.

<sup>‡</sup>Model 2 adjusted for age, sex, race (white vs. non-white), and updated body mass index (<25kg/m<sup>2</sup>, 25-30kg/m<sup>2</sup>, ≥30kg/m<sup>2</sup>).

<sup>§</sup>Model 3, adjusted for Model 2 + smoking status (current, past, never), alcohol intake (0 – 4.9 g/day, 5-14.9 g/day, ≥15 g/day), physical activity level (<3 METs/week, 3-8.9 METs/week, ≥9 METs/week), regular aspirin use (≥ 2 aspirin tablets per week vs non-use), and family history of diabetes (no vs. yes). All relevant covariates are updated over time.

**Table S5.** Diabetes and risk of Intrahepatic Cholangiocarcinoma (ICC) in women (1980-2012) and men (1986-2012)

|                                     | <b>No diabetes</b> | <b>Diabetes</b>  |
|-------------------------------------|--------------------|------------------|
| <i>Cases / Person-years</i>         | 27 / 4,192,607     | 4 / 295,836      |
| Age-adjusted Model; HR (95%CI)      | 1                  | 1.32 (0.45-3.82) |
| Multivariable Model 2*; HR (95% CI) | 1                  | 1.12 (0.38-3.28) |

Abbreviations: ICC, intrahepatic cholangiocarcinoma; HR, hazard ratio; CI, confidence interval

\*Multivariable model 2, adjusted for age in years, sex, race and body mass index (<25kg/m<sup>2</sup>, 25-30kg/m<sup>2</sup>, ≥30kg/m<sup>2</sup>).
